# Supplementary material for: Metal-free bi-functional cooperative catalysis: amine and quaternary amine-functionalized dendritic fibrous nanosilica as heterogeneous catalysts for the Henry reaction and CO2 conversion
Source: Royal Society of Chemistry journal article supplement (doi:10.1039/d4ta03980g), 2024-01-01
Supplement: d4ta03980g1.pdf [file d4ta03980g1.pdf]

## Supporting information

### **Metal-free Bi-functional Cooperative catalysis: Amine and quaternary amine-functionalized dendritic fibrous nanosilica as heterogeneous catalysts for Henry reaction and CO<sub>2</sub> conversion†**

Sanjay Yadav,<sup>\*ac‡</sup> Hanuman G. Kachgunde,<sup>bc‡</sup> Nishu Choudhary,<sup>ac</sup> Gopal H. Wanole,<sup>bc</sup> Krishnan Ravi,<sup>\*bc</sup> Ankush V. Biradar,<sup>\*bc</sup> and Alok Ranjan Paital<sup>\*ac</sup>

<sup>a</sup>*Salt and Marine Chemicals Division, CSIR-Central Salt & Marine Chemicals Research Institute, G.B. Marg, Bhavnagar-364002, Gujarat, India.*

*E-mail: [arpaital@csmcri.res.in](mailto:arpaital@csmcri.res.in); [sychem00700@gmail.com](mailto:sychem00700@gmail.com)*

<sup>b</sup>*Inorganic Materials and Catalysis Division, CSIR-Central Salt & Marine Chemicals Research Institute, G. B. Marg, Bhavnagar-364002, Gujarat, India.*

*E-mail: [ankush@csmcri.res.in](mailto:ankush@csmcri.res.in); [krishkicha545@gmail.com](mailto:krishkicha545@gmail.com)*

<sup>c</sup>*Academy of Scientific and Innovative Research (AcSIR), Ghaziabad-201002, India.*

<sup>‡</sup>*Contributed equally*

## Contents

| Sr. No | Content                                                                                                                                                        | Page No. |
|--------|----------------------------------------------------------------------------------------------------------------------------------------------------------------|----------|
| 1      | Materials & Methods                                                                                                                                            | S3       |
| 2      | Controlled Experiments                                                                                                                                         | S4       |
| 3      | Studies on the variation of catalysts for the nitroaldol condensation between benzaldehyde and nitromethane                                                    | S5       |
| 3      | The EDX analysis spectrum and mapping of the synthesized DFNS material (Fig. S1)                                                                               | S6       |
| 4      | The EDX analysis spectrum and the XPS analysis of the synthesized DFNS@NH <sub>2</sub> & the final Material DFNS@TBAB (Fig. S2-S3)                             | S7       |
| 5      | The UV-Vis, Raman profiles, the Basicity profile, and the effect of time (Fig. S4-S6)                                                                          | S8-9     |
| 6      | Recyclability studies, the FeSEM & TEM images of the recycled catalyst (Fig. S7-8)                                                                             | S9-10    |
| 7      | Fig. S9 GC-MS profile for (2-nitrovinyl)benzene                                                                                                                | S10-14   |
| 8      | Fig. S10 GC-MS profile for 4-(2-nitrovinyl)phenol                                                                                                              |          |
| 9      | Fig. S11 GC-MS profile for 4-(1,3-dinitropropan-2-yl)phenol                                                                                                    |          |
| 10     | Fig. S12 GC-MS profile for 2-methoxy-4-(2-nitrovinyl)phenol                                                                                                    |          |
| 11     | Fig. S13 GC-MS profile for 4-(1,3-dinitropropan-2-yl)-2-methoxyphenol                                                                                          |          |
| 12     | Fig. S14 GC-MS profile for 2-(2-nitrovinyl)benzene-1,3,5-triol                                                                                                 |          |
| 13     | Fig. S15 GC-MS profile for 2-(2-nitrovinyl)benzene-1,3,5-triol                                                                                                 |          |
| 14     | Fig. S16 GC-MS profile for 2-(2-nitrovinyl)phenol                                                                                                              |          |
| 15     | Fig. S17 GC-MS profile for 1-nitro-2-(2-nitrovinyl)benzene                                                                                                     |          |
| 16     | Fig. S18 GC-MS profile for 2-(2-nitrovinyl)furan                                                                                                               |          |
| 17     | Fig. S19 GC-MS profile for 2-methyl-5-(2-nitrovinyl)furan                                                                                                      |          |
| 18     | Fig. S20 GC-MS profile for (2-nitroprop-1-en-1-yl)benzene                                                                                                      |          |
| 19     | Fig. S21 GC-MS profile for 4-(2-nitroprop-1-en-1-yl)phenol                                                                                                     |          |
| 20     | Fig. S22 GC-MS profile for 2-methoxy-4-(2-nitroprop-1-en-1-yl)phenol                                                                                           |          |
| 21     | Fig. S23 GC-MS profile for 1-nitro-2-(2-nitroprop-1-en-1-yl)benzene                                                                                            |          |
| 22     | Fig. S24 GC-MS profile for 2-(2-nitroprop-1-en-1-yl)furan                                                                                                      |          |
| 23     | Fig. S25 GC-MS profile for 2-methyl-5-(2-nitroprop-1-en-1-yl)furan                                                                                             |          |
| 24     | Fig. S26 GC-MS profile for 4-phenyl-1,3-dioxolan-2-one                                                                                                         |          |
| 25     | <sup>1</sup> H NMR & <sup>13</sup> C NMR spectrum of 2-methyl-5-(2-nitrovinyl)furan                                                                            | S15      |
| 26     | <sup>1</sup> H NMR & <sup>13</sup> C spectrum of 4-(2-nitrovinyl)phenol                                                                                        | S16      |
| 27     | <sup>13</sup> C NMR spectrum of 2-methoxy-4-(2-nitrovinyl)phenol                                                                                               | S17      |
| 28     | CO <sub>2</sub> optimization studies (Table S2) & Comparison table for the metal-free Henry reaction between benzaldehyde and nitromethane (Table S3)          | S17-19   |
| 29     | Comparison table for the metal-free catalysts for the synthesis of styrene carbonate from styrene oxide and CO <sub>2</sub> (Table S4) & Supporting references | S19-20   |

## 1. Materials & Methods

Tetraphenylphosphonium bromide (TPPB), Urea, p-Xylene, Propanol, TEOS, Benzaldehyde (99%), 2,4,6-trihydroxy benzaldehyde (98%), Vanillin (>98%), Furfural (>98%), Styrene oxide (97%), 5-Methylfurfural (>98%) and 3-APTES were obtained from Merck (Sigma-Aldrich) & TCI India Pvt. Ltd.; p-hydroxybenzaldehyde (95%), ammonium nitrate, and Nitromethane (98%) were obtained from SRL Pvt. Ltd.; 2-Nitrobenzaldehyde (99%), Salicylaldehyde (98%), Nitroethane (98%), Dry toluene, and Dry acetonitrile were obtained from Spectrochem Pvt. Ltd. All chemicals and dry solvents were used without further purification.

## 2. Instrumentation

For structural characterization, FTIR spectra were measured with a Perkin-Elmer GX spectrophotometer (manufactured in the USA) using KBr pellets. Surface area measurements were conducted with the Micromeritics 3 FLEX instrument, activating the sample at 65 °C for 50 minutes before analysis. Scanning electron microscopy (SEM-Leo series 1420 VP) equipped with INCA, and transmission electron microscopy (TEM) using a JEOL JEM 2100 microscope with Lacey carbon-coated grids, were employed to determine surface morphology. X-ray photoelectron spectroscopy (XPS) was conducted for chemical and surface state analysis using a Thermo Fisher Nexsa spectrophotometer with monochromated Al K $\alpha$  radiation (energy of 1486.6 eV). Powder X-ray diffraction profiles were recorded using a MiniFlex-II (FD 41521) powder diffractometer from Rigaku, Japan, with a scan rate of 1° per minute. Thermal stability investigation involved TGA analysis using a Mettler-Toledo (TGA/SDTA 851E) instrument in the presence of air, with a heating rate of 10 °C/min. Thermal stability was investigated using TGA analysis on a Mettler-Toledo (TGA/SDTA 851E) instrument in an air

atmosphere, with a heating rate of 10 °C/min. <sup>1</sup>H and <sup>13</sup>C NMR spectra were recorded on a Bruker Advance 500 MHz NMR. Thermal stability was investigated using TGA analysis on a Mettler-Toledo (TGA/SDTA 851E) instrument in an air atmosphere, with a heating rate of 10 °C/min. The conversion and selectivity were analysed using a gas chromatography system equipped with an FID detector (GC-7890B-Agilent) with HP-5 column, consisting of 5% diphenyl and 95 % dimethyl polysiloxane capillary stationary phase and nitrogen as the carrier gas. The product was confirmed by GC-MS (equipped with FID as a detector (GC-MS Shimadzu, QP-2010, Japan) with HP-5 column which consists of 5 % diphenyl and 95 % dimethyl polysiloxane capillary phase with helium as the carrier gas and NMR analysis.

### 3. Controlled Experiments

IPA (-OH) and APTMS (-NH<sub>2</sub>) were taken as model compounds for the amine and hydroxyl functionality of DFNS@NH<sub>2</sub> (**Scheme S1**). The presence of Si-OH and -NH<sub>2</sub> from DFNS@NH<sub>2</sub> was confirmed by FT-IR.

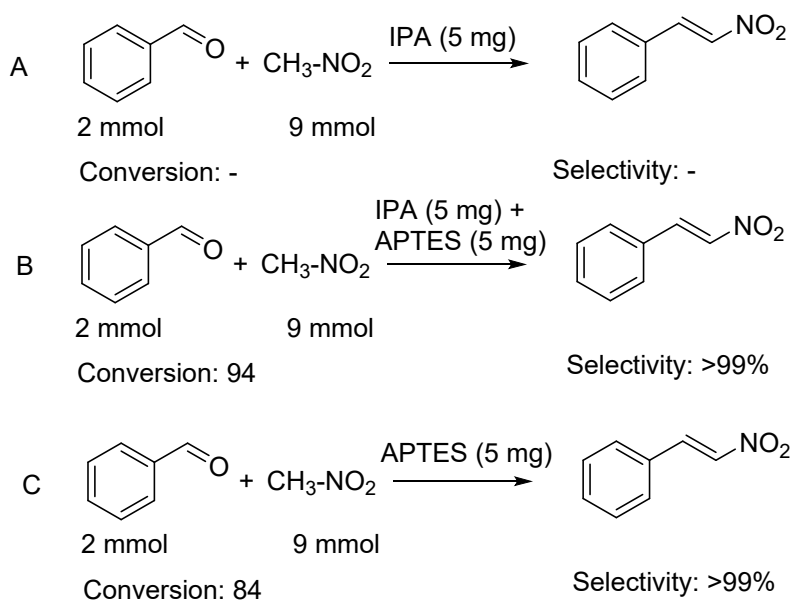

**(Scheme S1): Reaction Conditions:** Benzaldehyde: 2 mmol, Nitromethane: 11.2 mmol, Temperature; 50 °C, 6 h, Catalyst; 5 mg, A-IPA (5 mg), B-IPA+APTES (5+5 mg), and C-IPA (5 mg).

**Table S1.** Studies on the variation of catalysts for the nitroaldol condensation between benzaldehyde and nitromethane

| Entry | Catalyst                          | Conv. (%) | Selectivity (%) |    |
|-------|-----------------------------------|-----------|-----------------|----|
|       |                                   |           | B               | C  |
| 1     | blank                             | -         | -               | -  |
| 2     | Si(OH) <sub>4</sub>               | -         | -               | -  |
| 3     | SiO <sub>2</sub>                  | -         | -               | -  |
| 4     | SiO <sub>2</sub> @NH <sub>2</sub> | 3         | 100             | -  |
| 5     | Ba(OH) <sub>2</sub>               | -         | -               | -  |
| 6     | DFNS@NH <sub>2</sub>              | >87       | >99             | -  |
| 7     | MgO                               | 51        | >99             | -  |
| 8     | MgO-NH <sub>2</sub>               | >99       | 89              | 11 |

<sup>a</sup>**Reaction condition:** Benzaldehyde: 2 mmol (0.2 ml), Nitromethane: 9 mmol (0.6 ml), Temperature; 50 °C, 6 h

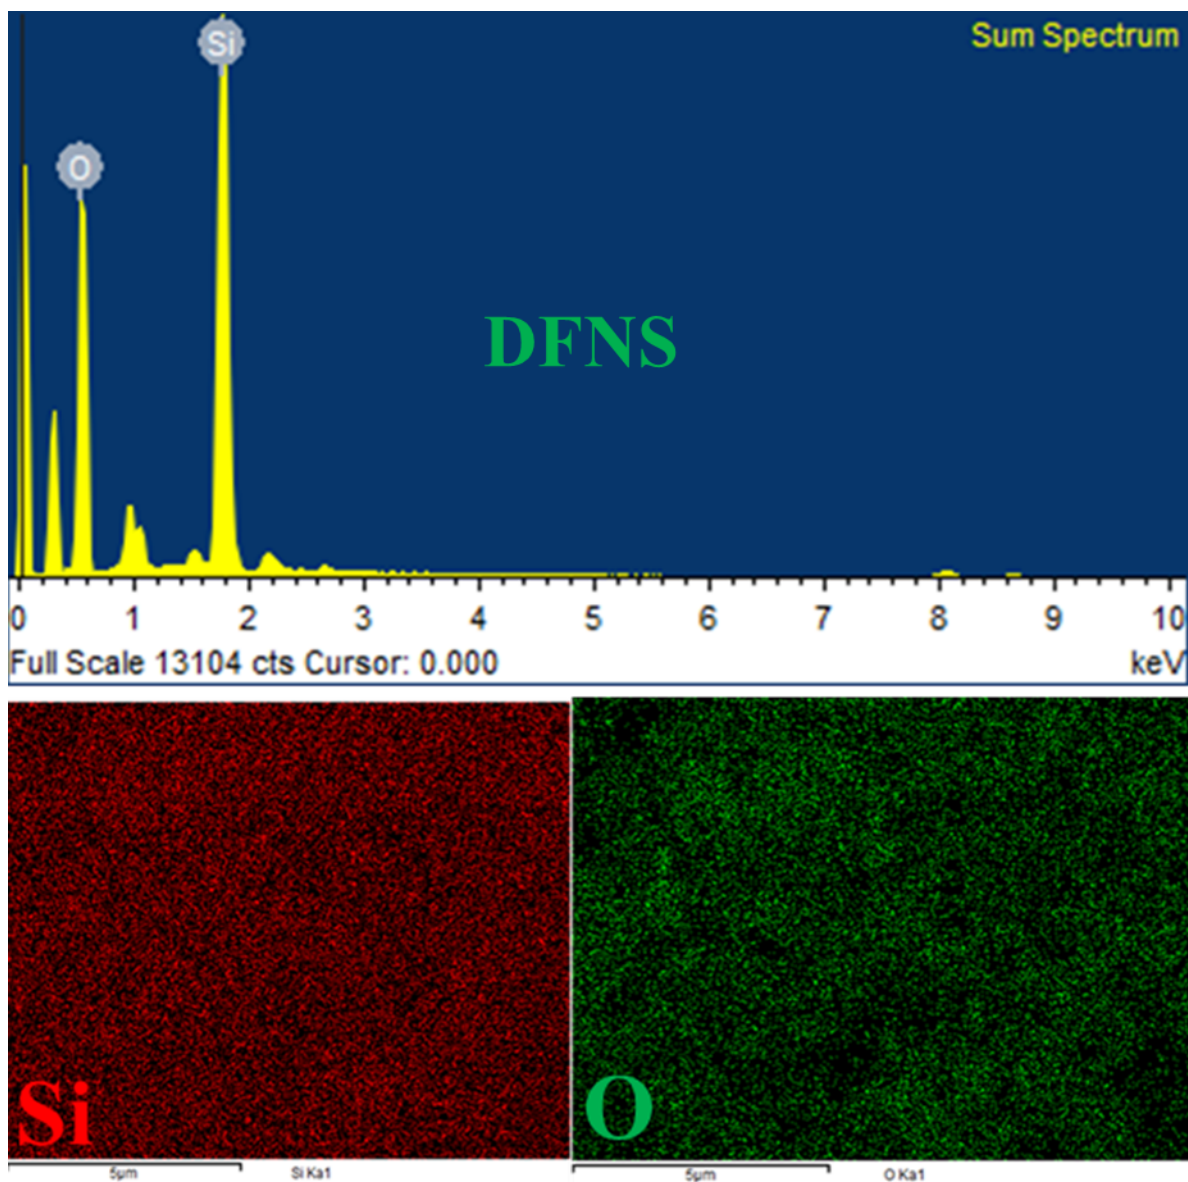

**Fig. S1** The EDX analysis spectrum and mapping of the synthesized DFNS material.

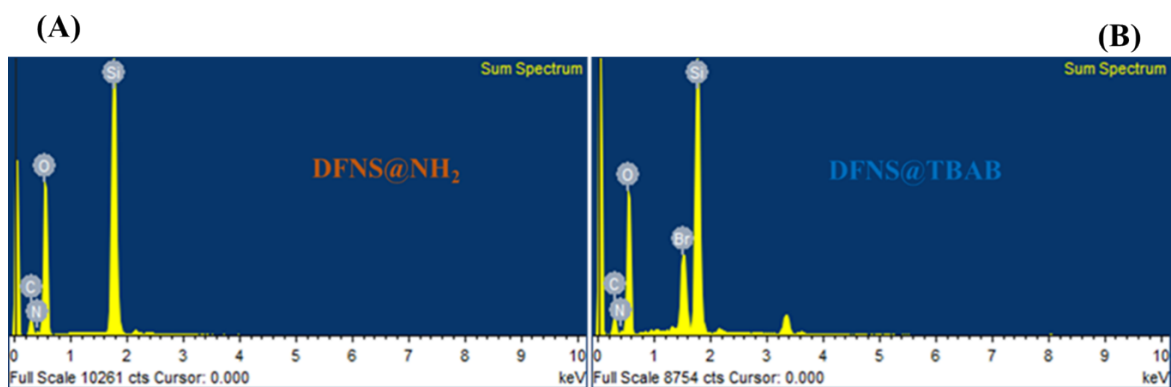

**Fig. S2** (A) The EDX analysis spectrum of the synthesized DFNS@NH<sub>2</sub> & the final Material DFNS@TBAB (B).

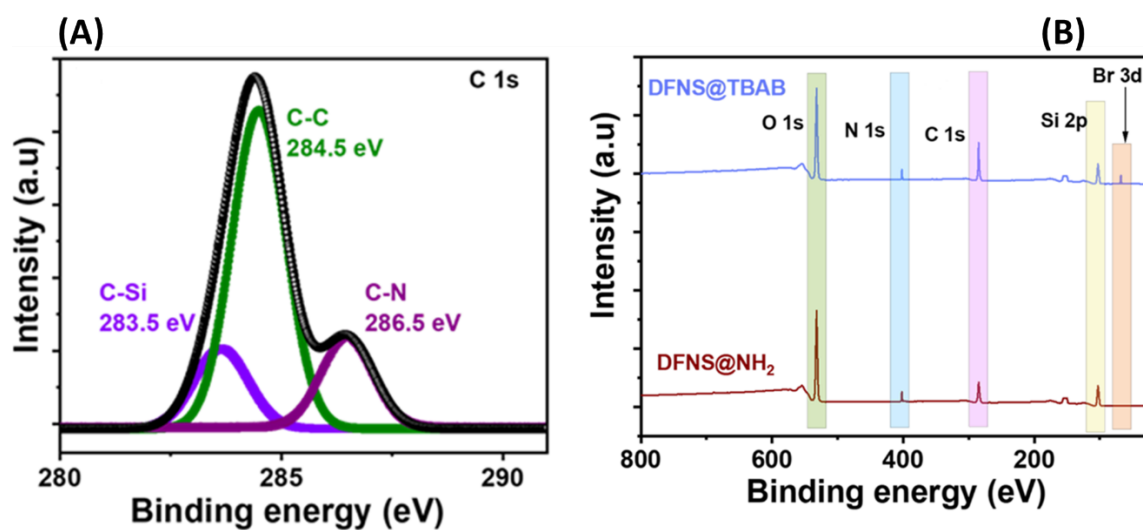

**Fig. S3** (A, B) The comparison of the XPS spectrum of the synthesized DFNS@NH<sub>2</sub> & the final material DFNS@TBAB.

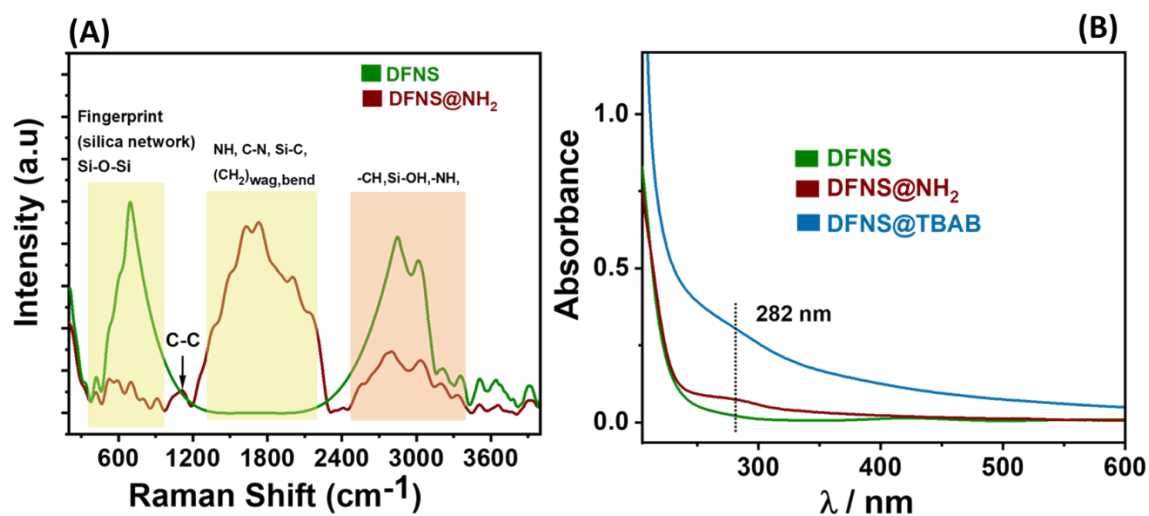

**Fig. S4** (A) The comparison of the Raman spectra of the synthesized DFNS and aminated DFNS@NH<sub>2</sub> materials; (B) The UV-Vis profile of the DFNS, DFNS@NH<sub>2</sub> & DFNS@TBAB materials

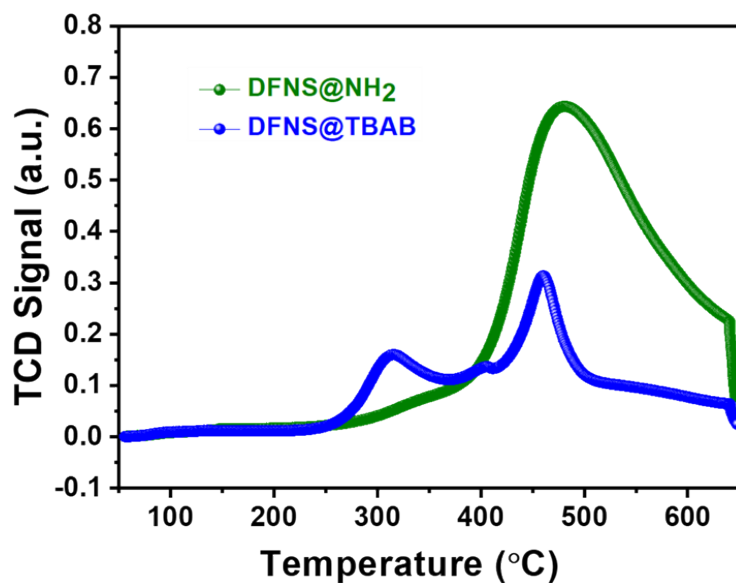

**Fig. S5** The CO<sub>2</sub>-TPD of DFNS@NH<sub>2</sub> and DFNS@TBAB.



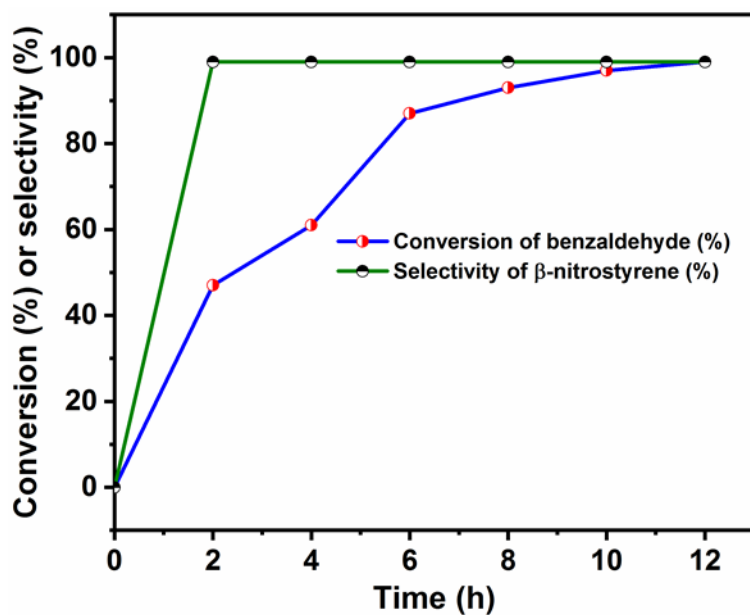

**Fig. S6** Effect of time, Reaction condition: Benzaldehyde; 2 mmol, Nitromethane; 11.2 mmol, Catalyst; 20 mg, Temperature; 50 °C.

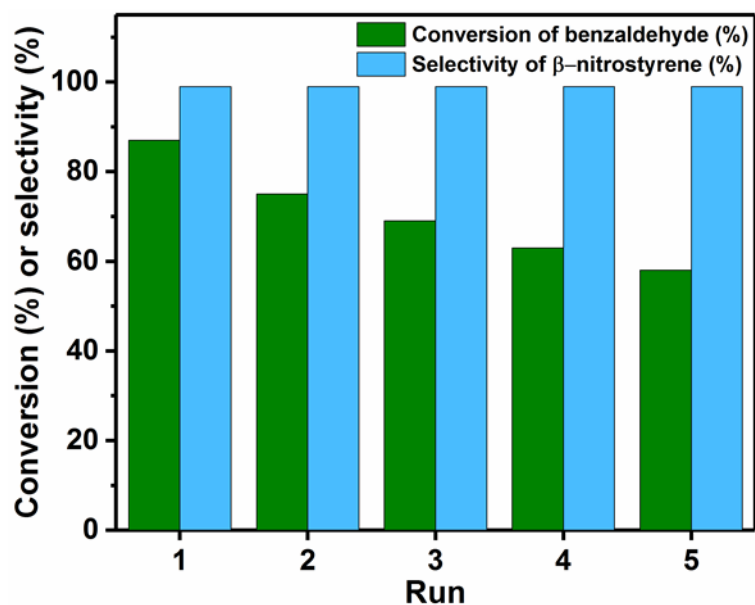

**Fig. S7** Recyclability studies of DFNS@NH<sub>2</sub><sup>a</sup> Reaction condition: Benzaldehyde: 2 mmol, Nitroethane: 11.2 mmol, Catalyst 20 mg, Temperature; 50°C, Time: 6 h.

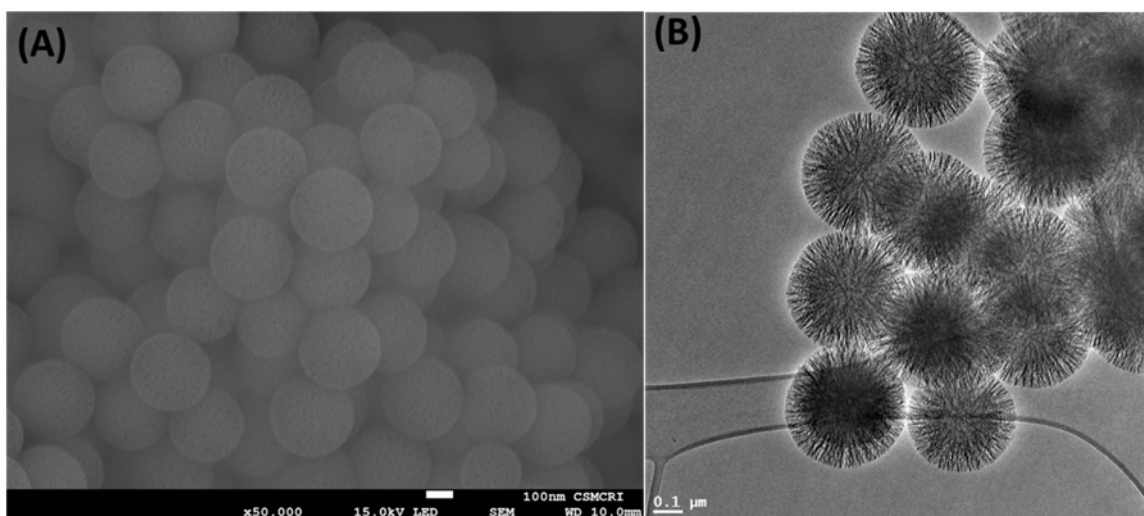

**Fig. S8** (A, B) The FeSEM and TEM images of the recycled catalyst after 5 cycles having retained dendritic morphology.

#### 4. GC-MS profile of the selected products

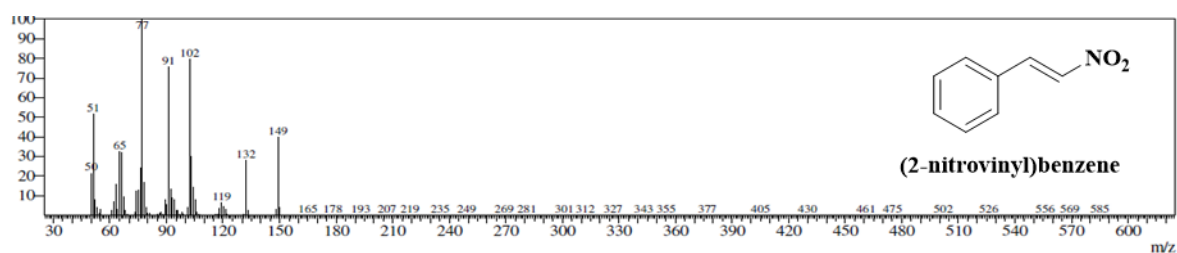

**Fig. S9** GC-MS profile for (2-nitrovinyl)benzene.

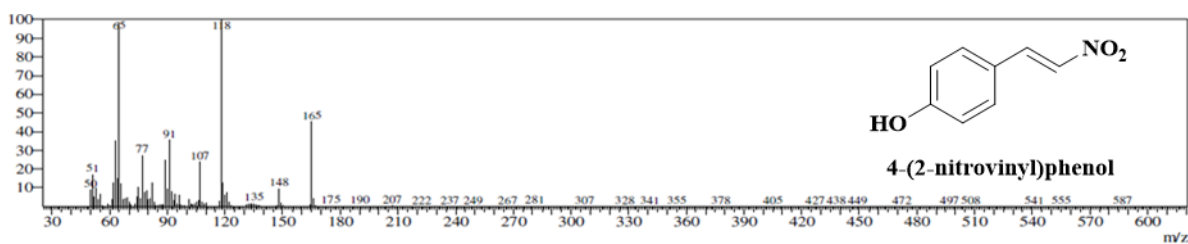

Fig. S10 GC-MS profile for 4-(2-nitrovinyl)phenol.

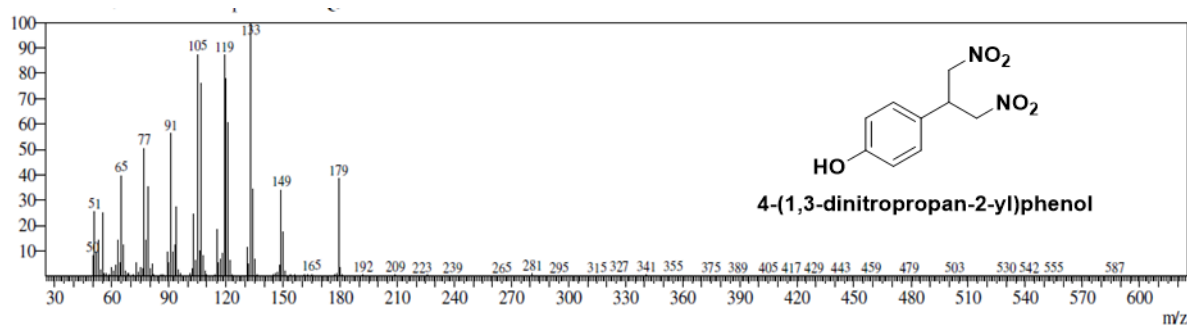

Fig. S11 GC-MS profile for 4-(1,3-dinitropropan-2-yl)phenol.

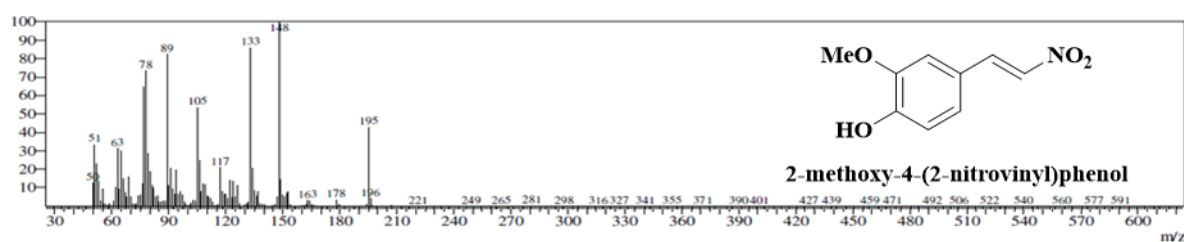

Fig. S12 GC-MS profile for 2-methoxy-4-(2-nitrovinyl)phenol.

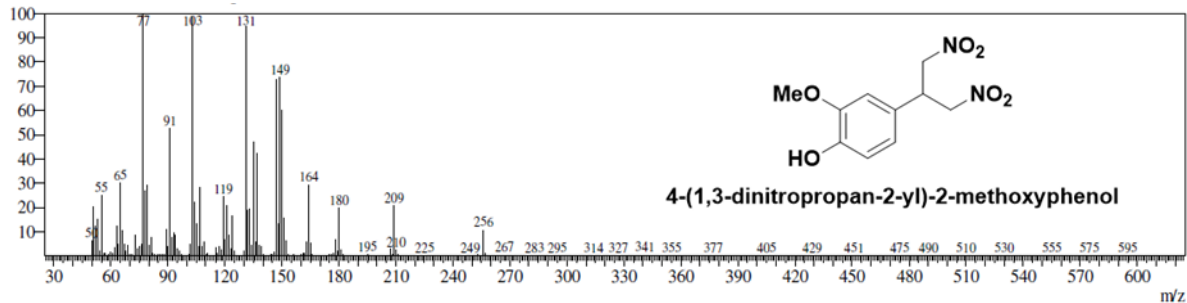

Fig. S13 GC-MS profile for 4-(1,3-dinitropropan-2-yl)-2-methoxyphenol.

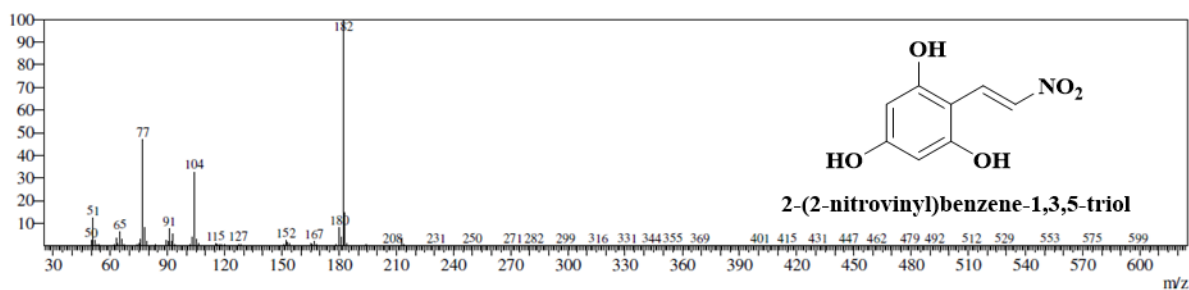

Fig. S14 GC-MS profile for 2-(2-nitrovinyl)benzene-1,3,5-triol.

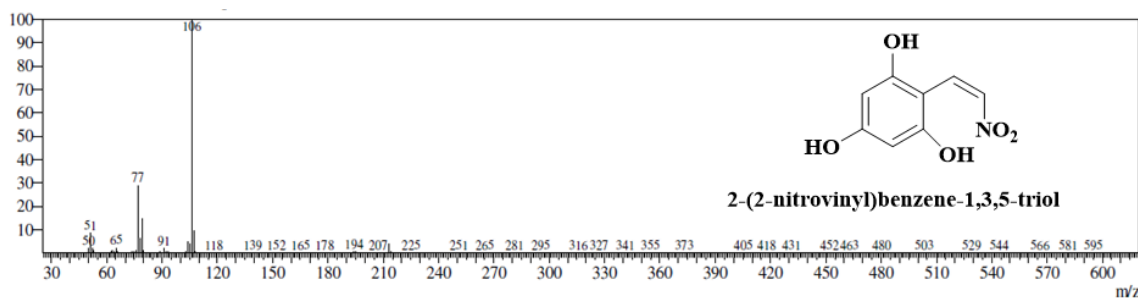

Fig. S15 GC-MS profile for 2-(2-nitrovinyl)benzene-1,3,5-triol.

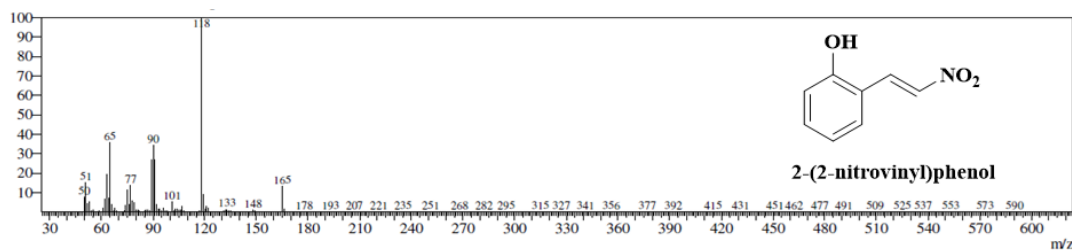

Fig. S16 GC-MS profile for 2-(2-nitrovinyl)phenol.

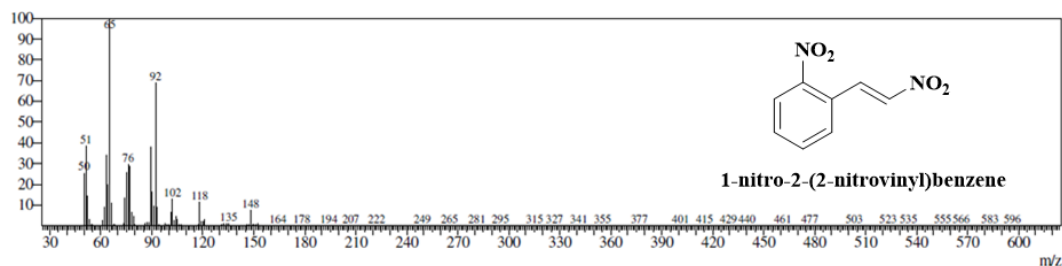

Fig. S17 GC-MS profile for 1-nitro-2-(2-nitrovinyl)benzene.

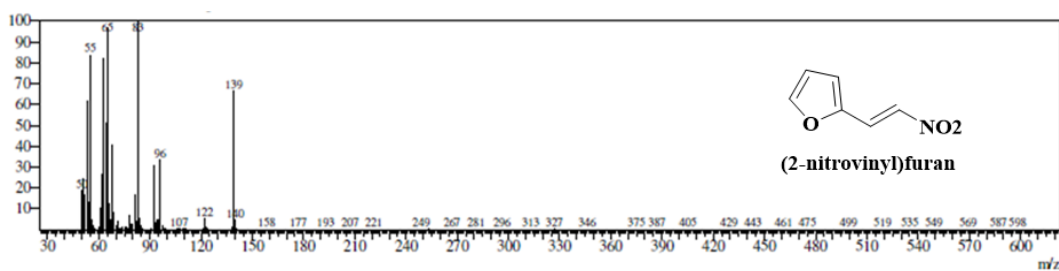

Fig. S18 GC-MS profile for 2-(2-nitrovinyl)furan.

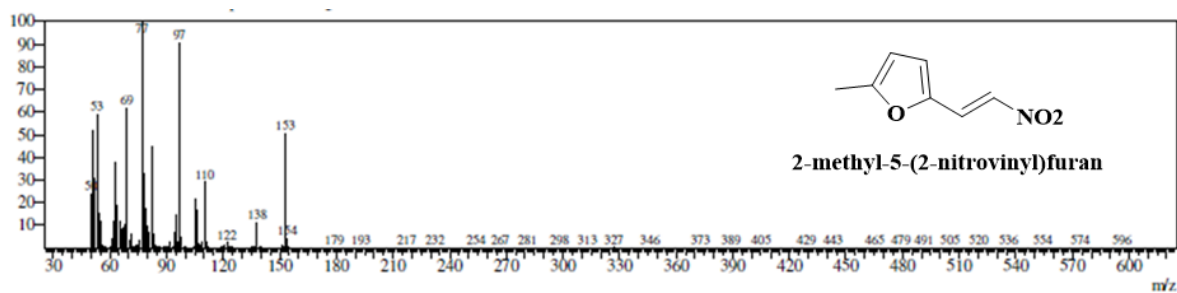

**Fig. S19** GC-MS profile for 2-methyl-5-(2-nitrovinyl)furan.

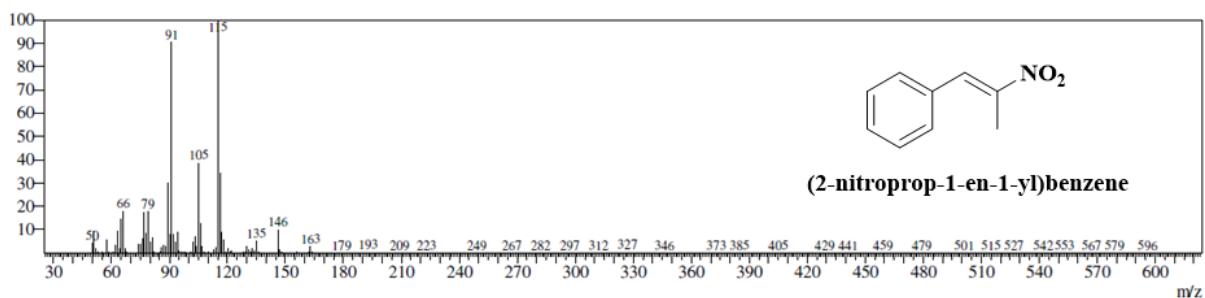

**Fig. S20** GC-MS profile for (2-nitroprop-1-en-1-yl)benzene.

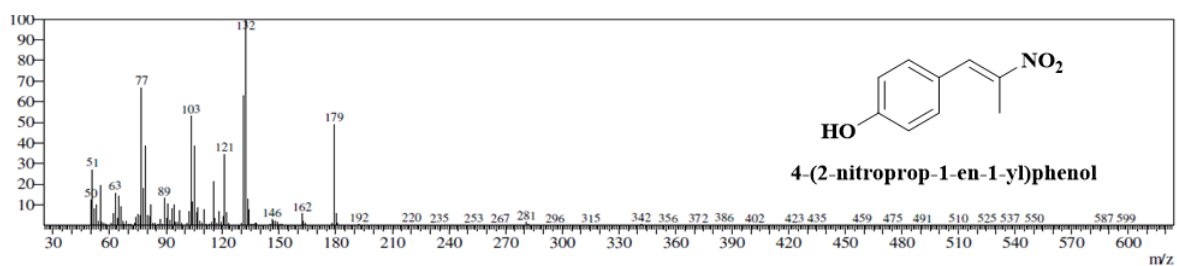

**Fig. S21** GC-MS profile for 4-(2-nitroprop-1-en-1-yl)phenol.

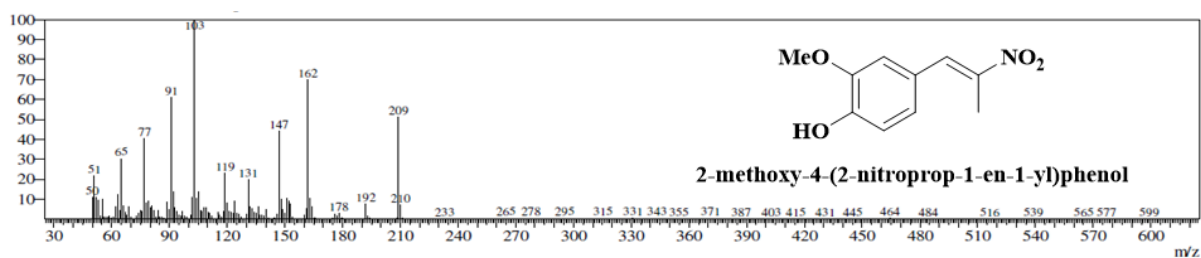

**Fig. S22** GC-MS profile for 2-methoxy-4-(2-nitroprop-1-en-1-yl)phenol.

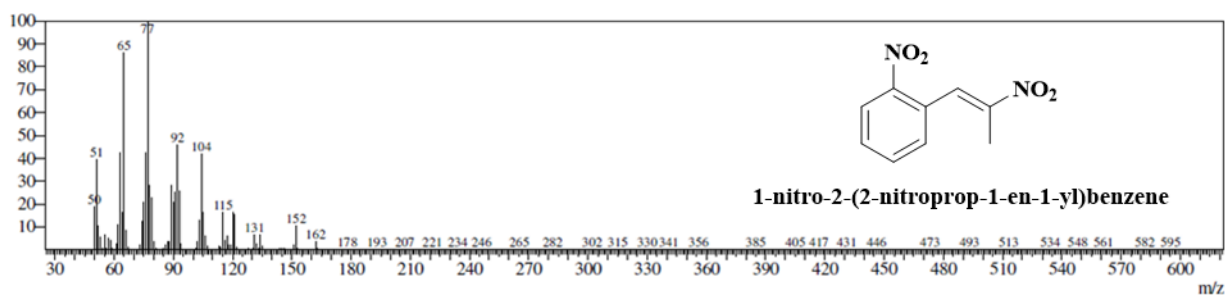

**Fig. S23** GC-MS profile for 1-nitro-2-(2-nitroprop-1-en-1-yl)benzene.

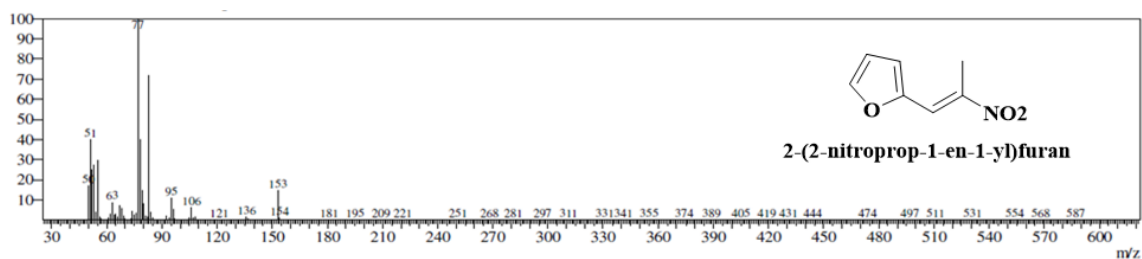

**Fig. S24** GC-MS profile for 2-(2-nitroprop-1-en-1-yl)furan.

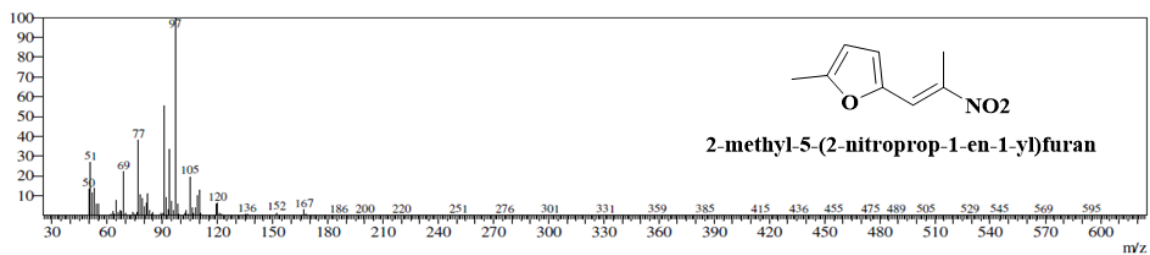

**Fig. S25** GC-MS profile for 2-methyl-5-(2-nitroprop-1-en-1-yl)furan.

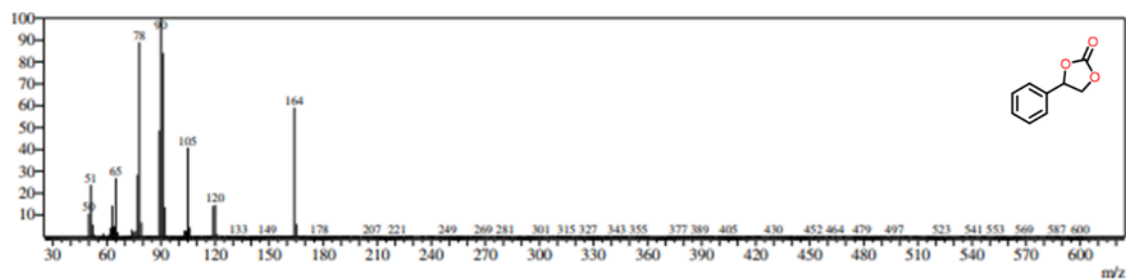

**Fig. S26** GC-MS profile for 4-phenyl-1,3-dioxolan-2-one

**5.  $^1\text{H}$  and  $^{13}\text{C}$  NMR analysis**

$^1\text{H}$  and  $^{13}\text{C}$  NMR analysis

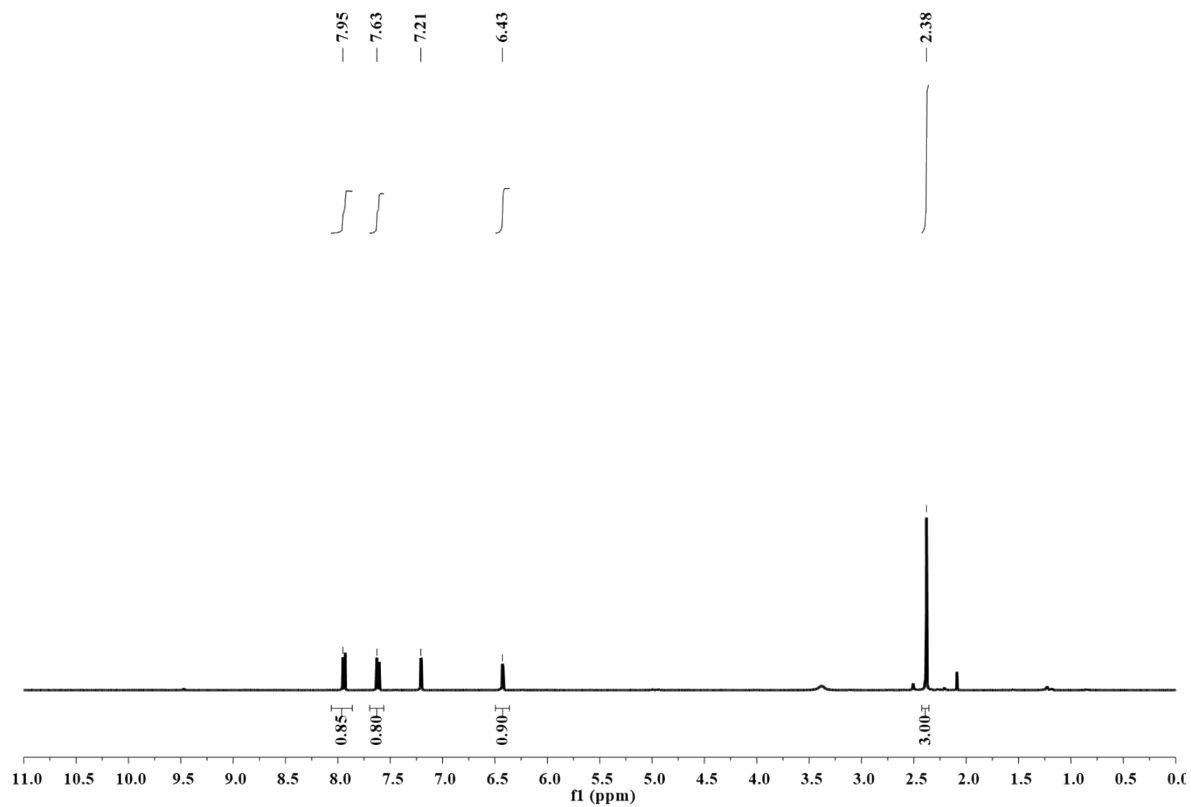

**Fig. S27**  $^{13}\text{C}$  NMR spectrum of 2-methyl-5-(2-nitrovinyl)furan

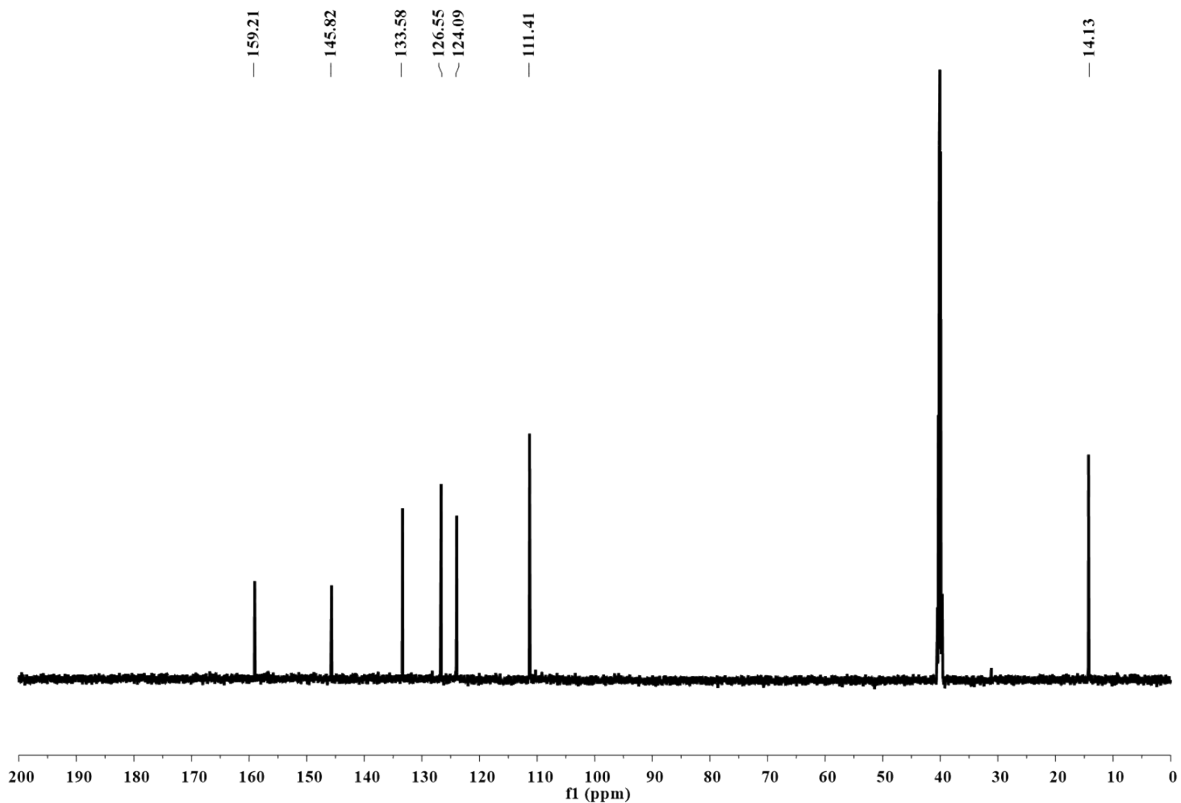

**Fig. S28**  $^{13}\text{C}$  NMR spectrum of 2-methyl-5-(2-nitrovinyl)furan

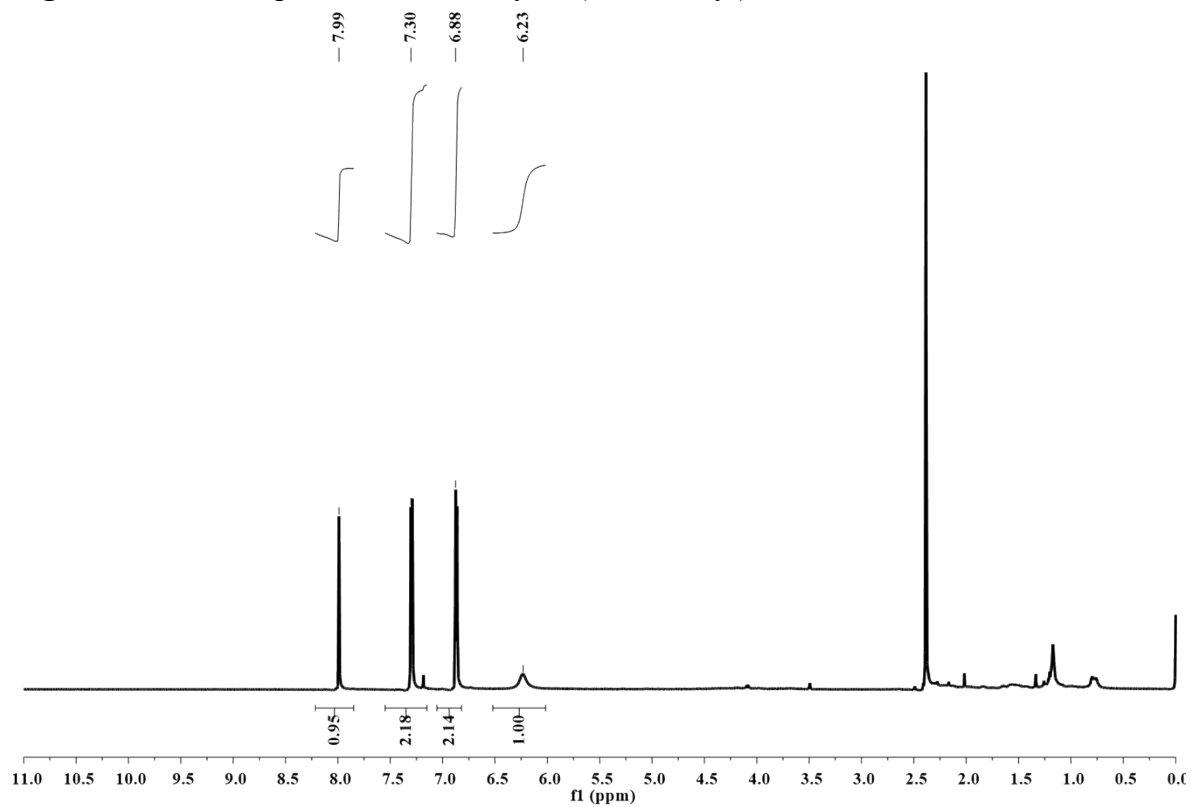

**Fig. S29**  $^1\text{H}$  NMR spectrum of 4-(2-nitrovinyl)phenol

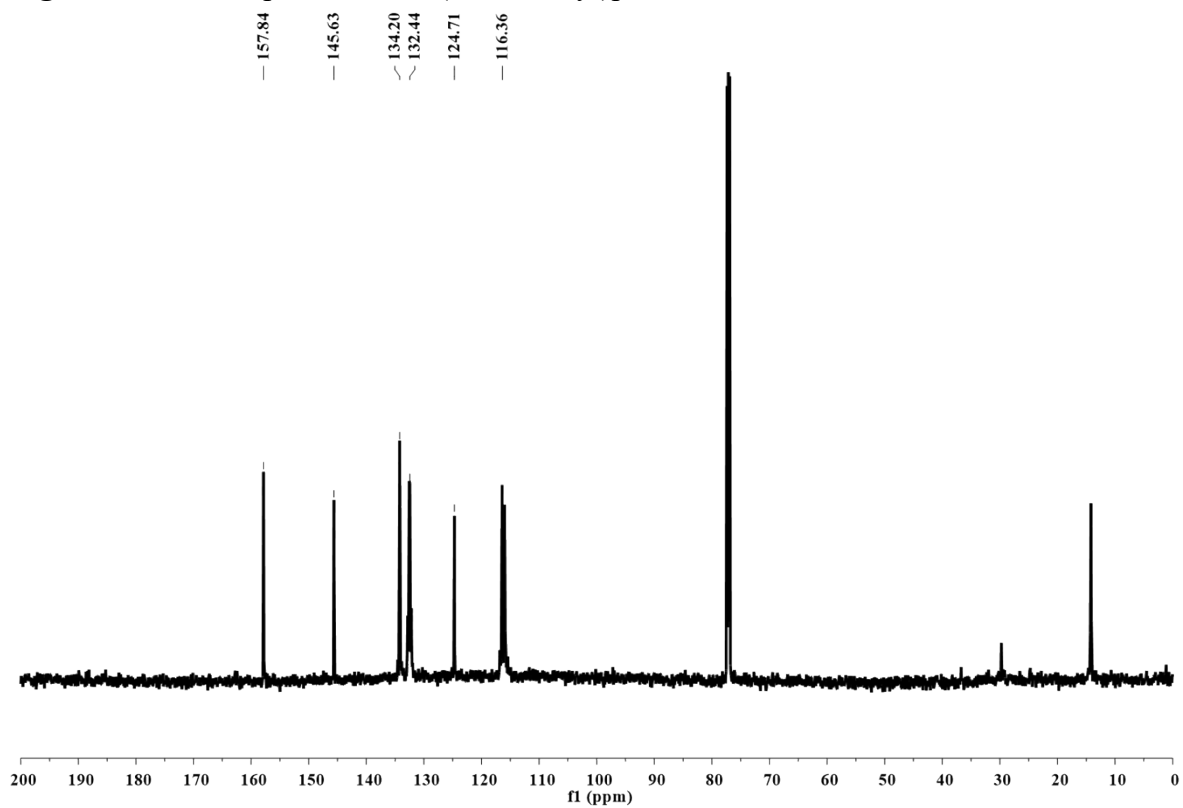

**Fig. S30**  $^{13}\text{C}$  NMR spectrum of 4-(2-nitrovinyl)phenol



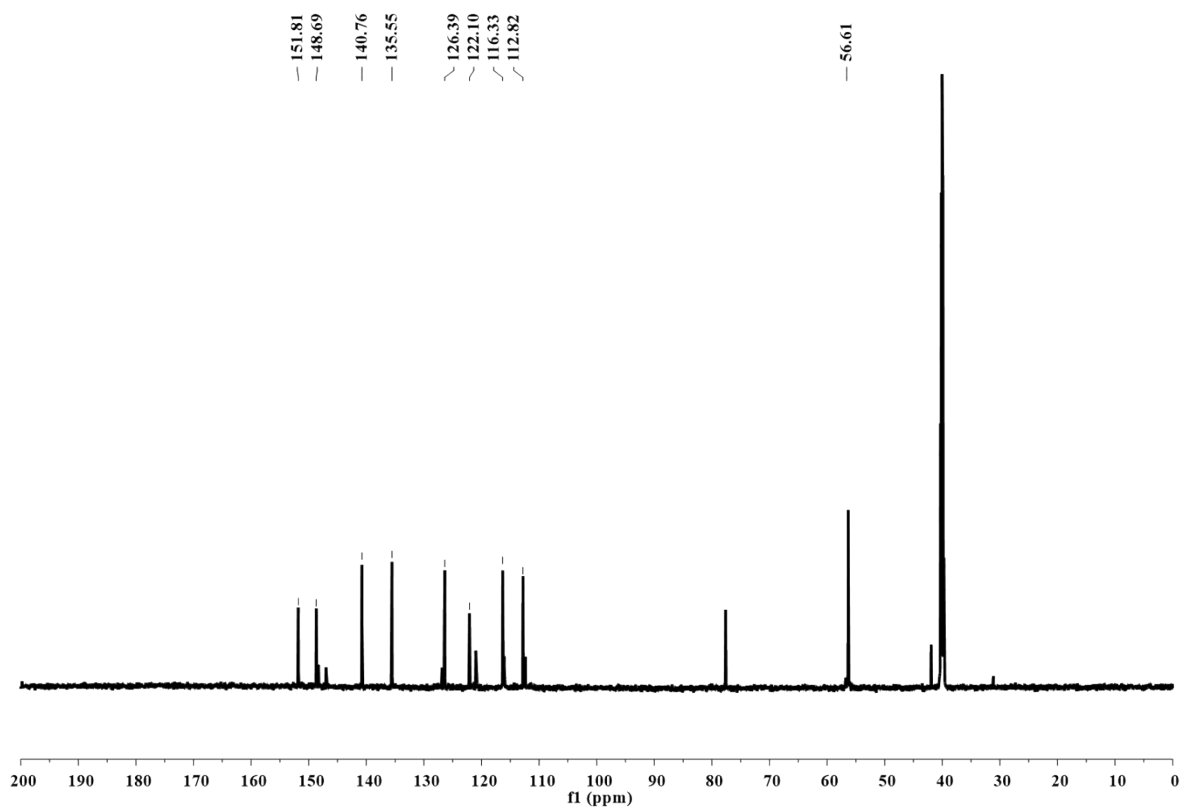

**Fig. S31**  $^{13}\text{C}$  NMR spectrum of 2-methoxy-4-(2-nitrovinyl)phenol

Table S2. Optimization studies cycloaddition of styrene oxide with  $\text{CO}_2$  using DFNS@TBAB

| Entry          | Catalyst                   | Catalyst amount | Temp ( $^{\circ}\text{C}$ ) | Time (h) | Conv. (%) | Sel. (%) |
|----------------|----------------------------|-----------------|-----------------------------|----------|-----------|----------|
| 1              | -                          | -               | 100                         | 12       | -         | -        |
| 2              | DFNS@ $\text{NH}_2$        | 25              | 100                         | 12       | -         | -        |
| 3 <sup>a</sup> | DFNS@ $\text{NH}_2$ + CTAB | 25              | 100                         | 12       | 96        | 90       |
| 4 <sup>b</sup> | DFNS@ $\text{NH}_2$ + KI   | 25              | 100                         | 12       | 90        | 88       |
| 5 <sup>c</sup> | DFNS@ $\text{NH}_2$ + n-BB | 25              | 100                         | 12       | 46        | 94       |
| 6 <sup>d</sup> | n-BB                       | 25              | 100                         | 12       | 16        | 90       |
| 7              | DFNS@TBAB                  | 25              | 100                         | 12       | 34        | 90       |
| 8              | DFNS@TBAB                  | 12.5            | 100                         | 12       | 14        | 93       |
| 9              | DFNS@TBAB                  | 50              | 100                         | 12       | 58        | 98       |
| 10             | DFNS@TBAB                  | 50              | 100                         | 12       | 72        | 98       |
| 11             | DFNS@TBAB                  | 100             | 100                         | 12       | 100       | 98       |

|    |           |    |     |    |    |    |
|----|-----------|----|-----|----|----|----|
| 12 | DFNS@TBAB | 25 | 60  | 12 | -  | -  |
| 13 | DFNS@TBAB | 25 | 80  | 12 | 10 | 98 |
| 14 | DFNS@TBAB | 25 | 100 | 12 | 36 | 98 |
| 15 | DFNS@TBAB | 25 | 120 | 12 | 88 | 98 |
| 16 | DFNS@TBAB | 25 | 120 | 3  | 10 | 98 |
| 17 | DFNS@TBAB | 25 | 120 | 6  | 34 | 98 |
| 18 | DFNS@TBAB | 25 | 120 | 9  | 66 | 98 |
| 19 | DFNS@TBAB | 25 | 120 | 12 | 88 | 98 |
| 20 | DFNS@TBAB | 25 | 120 | 15 | 94 | 98 |

Reaction conditions: Styrene oxide: 2.08 mmol and balloon CO<sub>2</sub> pressure, <sup>(a)</sup>CTAB (5 mg), <sup>(a)</sup>KI (5 mg), <sup>(c)</sup>n-BB (5 mg), and <sup>(d)</sup>25 mg. n-BB: n-butyl bromide

**Table S3.** Comparison of metal-free catalyst for Henry reaction between benzaldehyde and nitromethane

| Sr. No. | Catalyst                                                                                       | Reaction condition                                                             | Yield (%) | Reference |
|---------|------------------------------------------------------------------------------------------------|--------------------------------------------------------------------------------|-----------|-----------|
| 1       | $\mu$ -Chlorotris(tetrahydrofuran)[tris[1,1,1-trimethyl- <i>N</i> -(trimethylsilyl)silanaminat | Catalyst: 2 mol%, BA: 1 equivalent, NM: 1 equivalent, THF, 66 °C, 24 h         | 10        | S1        |
| 2       | Ammonium acetate                                                                               | Catalyst: 0.3 mmol, BA: 1 mmol, NM: 3 mL, microwave, 90 °C, 1 h                | 95        | S2        |
| 3       | Amine functionalized Yolk-shell-structured mesoporous silica                                   | Catalyst: 5 mol%, BA: 1.0 mmol, NM: 1.0 mL, 90 °C, 3 h                         | 99        | S3        |
| 4       | SiO <sub>2</sub> and triethylamine                                                             | Catalyst: 200 mg, Triethylamine: 0.2 mmol, BA: 2.0 mmol, NM: 2 mL, 50 °C, 17 h | 18        | S4        |
| 5       | AFB                                                                                            | Catalyst: 26.5 mg, BA: 2.5 mmol, NM: 2 mL, 90 °C, 6 h                          | 92        | S5        |

|   |                      |                                                                                                     |     |                  |
|---|----------------------|-----------------------------------------------------------------------------------------------------|-----|------------------|
| 6 | AP-GO                | Catalyst containing 0.075 mmol nitrogen species, BA: 0.306 mL (3.0 mmol), NM: 6.0 mL, 100 °C, 6.0 h | 90  | S6               |
| 7 | DFNS@NH <sub>2</sub> | Catalyst: 20 mg, BA: 2 mmol, NM: 11.2 mmol, , 60 °C, 6 h,                                           | >99 | <b>This work</b> |

BA: Benzaldehyde, NM: Nitromethane, AP-GO: Graphene oxide-supported primary amine, AFB: Amine functionalized bagasse

**Table S4.** Comparison of metal-free catalysts for the synthesis of styrene carbonate from styrene oxide and CO<sub>2</sub>

| Catalyst             | Co-catalyst | Reaction conditions                                         | Conv. (%) | Sel. (%)           | Ref.        |
|----------------------|-------------|-------------------------------------------------------------|-----------|--------------------|-------------|
| SB                   | KI          | 2 MPA CO <sub>2</sub> , 120 °C, 6 h                         | 87        | 99                 | S7          |
| COP-222              | -           | 0.1 MPA CO <sub>2</sub> , 100 °C, 24 h                      | 99        | 99                 | S8          |
| Amb-OH-I-910         | -           | 3.0 MPa of CO <sub>2</sub> , 120 °C, 24 h                   | -         | 99                 | S9          |
| PQPBrCO OH           | -           | 0.1 MPA CO <sub>2</sub> , 120 °C, 12 h                      | -         | 98.2               | S10         |
| CSGOArg aerogels     | THAB        | 100 °C, 8 h                                                 | -         | 65.39 <sup>a</sup> | S11         |
| [CMPy]Br/MA (1:1)    | -           | CO <sub>2</sub> balloon pressure, 90 °C, 1 h                | 100       | 100                | S12         |
| [TMGVBr]10@COF       | -           | 0.1 MPA CO <sub>2</sub> , acetonitrile (2 mL), 100 °C, 10 h | -         | 41.7 <sup>a</sup>  | S13         |
| Ketimine derivatives | TBAI        | 1 MPA CO <sub>2</sub> , RT, 24 h                            | -         | 94 <sup>a</sup>    | S14         |
| QAFB                 | -           | 0.1 MPA CO <sub>2</sub> , 120 °C, 12 h                      | 61        | 99                 | S5          |
| <b>DFNS@T</b>        | -           | <b>CO<sub>2</sub> (balloon pressure),</b>                   | <b>94</b> | <b>98</b>          | <b>This</b> |

---

**Abbreviations:** SO: Styrene oxide, C<sub>3</sub>N<sub>4</sub>: Graphitic carbon nitride, u-g-C<sub>3</sub>N<sub>4</sub>: Urea derived graphitic carbon nitride, p-TBIB: metal-free microporous polymeric spheres catalyst, P-g-C<sub>3</sub>N<sub>4</sub>: Phosphorus doped graphitic carbon nitride, Amb-OH-I-910: Ion-exchange step into their iodide counterparts, OX-BC: Oxidised biochar, SB: sugarcane bagasse, QAFB: Quaternary ammonium salt functionalized sugarcane bagasse, tetrabutylammonium bromide (TBAB), [CMPy]Br: 1-(carboxymethyl)pyridinium bromide, KI: Potassium iodide.<sup>a</sup>Yield

---

## References

1. Y. Y. Liu, S. W. Wang, L. J. Zhang, Y. J. Wu, Q. H. Li, G. S. Yang, M. H. Xie, *Chin. J. Chem.*, 2008, **26**, 2267-2272.
2. J. M. Rodríguez, M. D. Pujol, *Tetrahedron Lett.*, 2011, **52**, 2629-2632.
3. J. An, T. Cheng, X. Xiong, L. Wu, B. Han, G. Liu, *Catal. Sci. Technol.*, 2016, **6**, 5714-5720.
4. K. Tanemura, T. Suzuki, *Tetrahedron Lett.*, 2018, **59**, 392-396.
5. K. Ravi, S. Mehra, S. Tothadi, A. Kumar, A. V. Biradar, *J. Environ. Chem. Eng.*, 2023, **11**, 109737.
6. F. Zhang, H. Jiang, X. Wu, Z. Mao, H. Li, *ACS Appl. Mater. Interfaces.*, 2015, **7**, 1669-1677.
7. W. Chen, L. X. Zhong, X. W. Peng, R. C. Sun, F. C. Lu, *ACS Sustain. Chem. Eng.*, 2015, **3**, 147-152.
8. S. Subramanian, J. Oppenheim, D. Kim, T. S. Nguyen, W. M. Silo, B. Kim, C. T. Yavuz, *Chem*, 2019, **5**, 3232-3242.
9. Y. A. Alassmy, Z. Asgar Pour, P. P. Pescarmona, *ACS Sustain. Chem. Eng.*, 2020, **8**, 7993-8003.
10. Y. L. Wan, Z. Zhang, C. Ding, L. Wen, *J. CO<sub>2</sub> Util.*, 2021, **52**, 101673.
11. Y. L. Wan, Z. Zhang, C. Ding, Wen, L. *J. CO<sub>2</sub> Util.*, 2022, **59**, 101958.
12. F. Norouzi, A. Abdolmaleki, *J. Environ. Chem. Eng.*, 2024, **12**, 111984.
13. Q. Xue, P. Wang, L. Cheng, Y. Wei, Y. Wang, J. Lin, G. Guan, Q. Xue, *Sep. Purif. Technol.*, 2025, **352**, 128175.
14. S. Roy, K. Das, S. Halder, *Catal. Lett.*, 2024, **154**, 2243-2254.
